# Supplementary material
Source: publisher figshare collection journal article supplement (https://plos.figshare.com/articles/dataset/_/143943)
Supplement: Supplementary file [file 1]

## **Appendix D**

### Quebec population case-control study – Additional details

**Appendix D1. Quebec pH1N1 population case-control study – exclusion criteria and participation by study group**

|                                                 | <b>Community<br/>pH1N1 cases</b> | <b>Hospitalized<br/>pH1N1 cases</b> | <b>Community<br/>controls</b> |
|-------------------------------------------------|----------------------------------|-------------------------------------|-------------------------------|
| Reported cases / random phone numbers generated | 993                              | 415                                 | 2820                          |
| Phone number unknown                            | 343                              | 48                                  | 724*                          |
| No response/not reached                         | 243                              | 25                                  | 1082                          |
| Phone contact made                              | 407                              | 342                                 | 1014                          |
| Refusal                                         | 11                               | 4                                   | 325                           |
| Not able to speak English/French                | 1                                | 1                                   | 59                            |
| Before exclusions                               | 395                              | 337                                 | 630                           |
| Exclusions                                      | 11                               | 67                                  | 27                            |
| < 6 month (Dec 1st 2008)                        | 6                                | 19                                  | 26                            |
| Hospitalized for reason other than pH1N1        | N/A                              | 16                                  | N/A                           |
| Unknown vaccination status                      | 5                                | 33                                  | 1                             |
| Final participation                             | 384                              | 270                                 | 603                           |

pH1N1= pandemic influenza A (H1N1); N/A=Not applicable

\* Phone numbers generated by random digit dialling that were either invalid, not in service or for business

## Appendix D2: Quebec pH1N1 population case-control study: participant profile

|                                    | Community pH1N1 cases (N=384) |               |                |                |                |               | Hospitalized pH1N1 cases (N=270) |               |                |                |                |               | Community controls (N=603) |               |                |                |                |               |  |
|------------------------------------|-------------------------------|---------------|----------------|----------------|----------------|---------------|----------------------------------|---------------|----------------|----------------|----------------|---------------|----------------------------|---------------|----------------|----------------|----------------|---------------|--|
|                                    | 6-59<br>mos                   | 5-19<br>years | 20-34<br>years | 35-49<br>years | 50-59<br>years | ≥ 60<br>years | 6-59<br>mos                      | 5-19<br>years | 20-34<br>years | 35-49<br>years | 50-59<br>years | ≥ 60<br>years | 6-59<br>mos                | 5-19<br>years | 20-34<br>years | 35-49<br>years | 50-59<br>years | ≥ 60<br>years |  |
| <b>N</b>                           | 12<br>n (%)                   | 158<br>n (%)  | 89<br>n (%)    | 62<br>n (%)    | 44<br>n (%)    | 19<br>n (%)   | 35<br>n (%)                      | 73<br>n (%)   | 40<br>n (%)    | 50<br>n (%)    | 37<br>n (%)    | 35<br>n (%)   | 40<br>n (%)                | 201<br>n (%)  | 101<br>n (%)   | 114<br>n (%)   | 88<br>n (%)    | 59<br>n (%)   |  |
| <b>Symptoms</b>                    |                               |               |                |                |                |               |                                  |               |                |                |                |               |                            |               |                |                |                |               |  |
| Fever + cough                      | 7 (58)                        | 112 (71)      | 63 (72)        | 46 (74)        | 32 (73)        | 10 (52)       | 29 (85)                          | 59 (81)       | 32 (80)        | 42 (84)        | 31 (84)        | 25 (71)       | 2 (5)                      | 8 (4)         | 5 (5)          | 2 (2)          | 1 (1)          | 0             |  |
| ILI                                | 3 (25)                        | 109 (69)      | 62 (70)        | 46 (74)        | 31 (70)        | 10 (53)       | 15 (43)                          | 42 (57)       | 26 (65)        | 32 (64)        | 27 (73)        | 17 (48)       | 0                          | 8 (4)         | 4 (4)          | 2 (2)          | 1 (1)          | 0             |  |
| <b>Female</b>                      | 5 (41)                        | 75 (48)       | 56 (63)        | 36 (58)        | 30 (68)        | 14 (74)       | 15 (44)                          | 26 (36)       | 27 (67)        | 31 (62)        | 25 (67)        | 20 (57)       | 20 (50)                    | 101 (50)      | 67 (66)        | 74 (65)        | 50 (57)        | 41 (69)       |  |
| <b>Chronic conditions</b>          | 3 (25)                        | 42 (27)       | 15 (17)        | 11 (18)        | 12 (27)        | 13 (68)       | 14 (41)                          | 37 (51)       | 28 (70)        | 30 (60)        | 24 (65)        | 30 (86)       | 0                          | 13 (6)        | 17 (17)        | 19 (17)        | 20 (23)        | 26 (44)       |  |
| <b>Smoker<sup>†‡</sup></b>         | N/A                           | 5 (3)         | 16 (18)        | 12 (19)        | 9 (20)         | 1 (5)         | N/A                              | 2 (3)         | 11 (27)        | 14 (28)        | 11 (30)        | 9 (26)        | N/A                        | 7 (3)         | 21 (21)        | 23 (20)        | 26 (29)        | 8 (14)        |  |
| <b>HCW<sup>§</sup></b>             | N/A                           | N/A           | 25 (28)        | 21 (34)        | 18 (41)        | 3 (16)        | N/A                              | N/A           | 2 (5)          | 3 (6)          | 2 (5)          | 1 (3)         | N/A                        | N/A           | 7 (7)          | 16 (14)        | 13 (15)        | 0             |  |
| <b>TIV Status</b>                  |                               |               |                |                |                |               |                                  |               |                |                |                |               |                            |               |                |                |                |               |  |
| 2008-09                            | 5 (42)                        | 49 (31)       | 32 (36)        | 24 (39)        | 26 (59)        | 9 (47)        | 16 (46)                          | 24 (33)       | 11 (27)        | 24 (48)        | 15 (40)        | 29 (83)       | 10 (25)                    | 18 (9)        | 16 (16)        | 26 (23)        | 19 (21)        | 30 (51)       |  |
| 2007-08 <sup>‡</sup>               | 2 (40)                        | 51 (32)       | 30 (34)        | 32 (52)        | 28 (64)        | 8 (42)        | 11 (55)                          | 29 (39)       | 13 (32)        | 24 (49)        | 16 (43)        | 27 (82)       | 7 (29)                     | 29 (14)       | 18 (17)        | 30 (26)        | 18 (20)        | 30 (51)       |  |
| 2007-08 <sup>‡</sup> only          | 0                             | 12 (7)        | 5 (6)          | 9 (15)         | 3 (7)          | 0             | 3 (15)                           | 6 (8)         | 5 (13)         | 3 (6)          | 2 (5)          | 0             | 5 (21)                     | 13 (6)        | 6 (6)          | 9 (8)          | 0              | 1 (2)         |  |
| 2008-09 only                       | 3 (25)                        | 10 (6)        | 7 (8)          | 1 (2)          | 1 (2)          | 1 (5)         | 6 (17)                           | 2 (3)         | 4 (10)         | 2 (4)          | 2 (5)          | 2 (6)         | 8 (20)                     | 1 (0.5)       | 4 (4)          | 5 (4)          | 1 (1)          | 1 (2)         |  |
| 2007 & 2008 <sup>‡</sup>           | 2 (40)                        | 39 (25)       | 25 (28)        | 23 (38)        | 25 (57)        | 8 (42)        | 8 (40)                           | 22 (30)       | 7 (17)         | 21 (43)        | 14 (38)        | 27 (82)       | 2 (8)                      | 16 (8)        | 12 (11)        | 21 (18)        | 18 (20)        | 29 (49)       |  |
| 5 in 5 yrs                         | -                             | 23 (15)       | 13 (15)        | 16 (26)        | 21 (48)        | 7 (37)        | -                                | 18 (25)       | 6 (15)         | 15 (30)        | 12 (30)        | 23 (66)       | -                          | 9 (5)         | 7 (7)          | 16 (14)        | 15 (17)        | 24 (41)       |  |
| ≥1 in 5 yrs                        | 5 (42)                        | 69 (44)       | 41 (46)        | 42 (68)        | 32 (73)        | 9 (47)        | 21 (60)                          | 38 (52)       | 19 (47)        | 29 (58)        | 18 (48)        | 29 (83)       | 18 (45)                    | 34 (17)       | 28 (28)        | 41 (36)        | 26 (29)        | 35 (59)       |  |
| None in 5 yrs                      | -                             | 86 (54)       | 48 (54)        | 20 (32)        | 12 (27)        | 9 (47)        | -                                | 22 (30)       | 20 (50)        | 19 (38)        | 16 (43)        | 4 (11)        | -                          | 167 (83)      | 73 (72)        | 73 (64)        | 62 (70)        | 24 (41)       |  |
| 1-3 in 5 yrs                       | -                             | 34 (21)       | 22 (25)        | 21 (34)        | 9 (20)         | 2 (10)        | -                                | 13 (18)       | 9 (22)         | 11 (22)        | 6 (16)         | 0             | -                          | 16 (8)        | 20 (20)        | 20 (17)        | 9 (10)         | 10 (17)       |  |
| 4-5 in 5 yrs                       | -                             | 31 (20)       | 19 (21)        | 21 (34)        | 23 (52)        | 7 (37)        | -                                | 21 (29)       | 8 (20)         | 16 (32)        | 13 (35)        | 26 (72)       | -                          | 11 (5)        | 9 (9)          | 23 (20)        | 17 (19)        | 25 (42)       |  |
| <b>No chronic condition (N)</b>    | 9                             | 116           | 74             | 51             | 32             | 6             | 20                               | 36            | 12             | 20             | 13             | 5             | 40                         | 188           | 84             | 95             | 68             | 33            |  |
| TIV 2008-09                        | 3 (33)                        | 29 (25)       | 27 (37)        | 20 (39)        | 17 (53)        | 3 (50)        | 8 (40)                           | 6 (17)        | 2 (17)         | 5 (25)         | 3 (23)         | 3 (60)        | 10 (25)                    | 17 (9)        | 13 (15)        | 19 (20)        | 11 (16)        | 13 (40)       |  |
| <b>With chronic conditions (N)</b> | 3                             | 42            | 15             | 11             | 12             | 13            | 15                               | 37            | 28             | 30             | 24             | 30            | 0                          | 13            | 17             | 19             | 20             | 26            |  |
| TIV 2008-09                        | 2 (67)                        | 20 (48)       | 5 (33)         | 4 (36)         | 9 (75)         | 6 (46)        | 8 (53)                           | 18 (49)       | 9 (32)         | 19 (63)        | 12 (50)        | 26 (87)       | 0                          | 1 (8)         | 3 (18)         | 7 (34)         | 8 (40)         | 17 (65)       |  |

pH1N1= pandemic influenza A (H1N1); TIV=trivalent inactivated influenza vaccine; N/A=Not applicable

ILI=influenza-like illness: fever plus cough plus one or more of sore throat, myalgia, arthralgia, headache or prostration

<sup>†</sup>Smoker defined as: any current smoking

<sup>‡</sup>For these variables denominators are slightly different due to missing or not applicable values

<sup>§</sup>HCW=Health care worker defined as: any person working in the health care system with or without direct contact with patients

NOTE: where percentages do not sum 100%, this is owing to missing data
