# Supplementary material
Source: publisher figshare collection journal article supplement (https://plos.figshare.com/articles/dataset/_/143943)
Supplement: Supplementary file [file 1]

## **Appendix C**

Trivalent inactivated influenza vaccine (TIV) coverage by age category  
estimated from the Canadian Community Health survey (2007-08 season)

**Appendix C: Trivalent inactivated influenza vaccine (TIV) coverage by age category estimated from the Canadian Community Health Survey (2007-08 season)\***

|         | TIV coverage (95% CI) by age category |                |                |                |               |               |
|---------|---------------------------------------|----------------|----------------|----------------|---------------|---------------|
|         | 12-19<br>years                        | 20-34<br>years | 35-44<br>years | 45-64<br>years | ≥ 65<br>years | ≥ 12<br>years |
| BC      | 24% (21-27)                           | 17% (15-19)    | 22% (20-25)    | 32% (30-34)    | 64% (62-67)   | 31% (30-32)   |
| Alberta | 21% (18-24)                           | 18% (16-21)    | 21% (18-23)    | 28% (26-30)    | 65% (62-68)   | 27% (26-28)   |
| Ontario | 30% (28-34)                           | 20% (19-22)    | 27% (25-28)    | 41% (39-42)    | 73% (72-75)   | 37% (36-37)   |
| Quebec  | 10% (9-12)                            | 13% (11-14)    | 19% (17-21)    | 27% (25-29)    | 63% (61-65)   | 26% (25-27)   |
| Canada  | 23% (22-24)                           | 17% (17-18)    | 23% (22-24)    | 34% (33-35)    | 68% (67-69)   | 32% (31-32)   |

\*Statistics Canada (2009) Influenza Immunization Coverage by Province and age 2007-08. In: Table 105-0502. Health indicator profile, annual estimates, by age group and sex, Canada, provinces, territories, health regions (2007 boundaries) and peer groups, occasional (1209600 series). Available at: [http://cansim2.statcan.gc.ca/cgi-win/cnsmcgi.pgm?Lang=E&RootDir=CII/&Array\\_Pick=1&ArrayId=105-0502&C2DB=PRD&ResultTemplate=CII%2FCII](http://cansim2.statcan.gc.ca/cgi-win/cnsmcgi.pgm?Lang=E&RootDir=CII/&Array_Pick=1&ArrayId=105-0502&C2DB=PRD&ResultTemplate=CII%2FCII)
